# Supplementary material for: Synthesis of human amyloid restricted to liver results in an Alzheimer disease–like neurodegenerative phenotype
Source: PLoS Biol. 2021 Sep 14;19(9):e3001358. doi: 10.1371/journal.pbio.3001358 (PMC8439475; doi:10.1371/journal.pbio.3001358)
Supplement: S1 Data — (XLSX) [file pbio.3001358.s001.xlsx]

## Sheet: Figure 1A-B
Figure 1. mRNA expression of human APP relative to reported gene Eef2
Figure 1A. Baseline qPCR at 6 weeks
	Liver			Brain			Duodenum			Lung
WT	1.02	1.03	0.96	0.97	0.97	1.06	1.12	0.95	0.94	0.96	1.02	1.02
KI	2.7	4.77	4.52	1.3	3.81	2.92	11.64	6.79	9.06	4.07	5.77	3.05
HSHA	2.25	2.68	5.03	1.33	1.31	0.96	1.18	0.85	1.32	1.05	0.7	0.93
Figure 1B. qPCR of brain and liver at different ages
	Liver			Brain
6 weeks	0.82	1.08	1.14	0.97	1.03	1.1
6 months	1.27	1.73	0.94	1	1.25	2.21
12 months	1.23	0.83	0.98	1.2	1.32	1.15
18 months	1.31	1.51	1.82	0.76	1.28	1.17

## Sheet: Figure 2A-F
Figure 2B-F. Plasma and brain concentrations of apoB and amyloid-β
		WT	HSHA
Figure 2B. Plasma ApoB (ng/mL)		166.823	566.129
		139.113	227.186
		208.291	170.718
			439.539
			128.974
			119.212
Figure 2C. Brain ApoB (ng/ug protein)		13.025	16.419
		8.879	53.298
		14.797	21.248
			6.821
			24.473
			10.724
			7.248
			13.366
Figure 2D.	Plasma Aβ (Human; pg/mL)	0	127.9
		0	12.5
		0	13.1
		0	6.7
		0	11.1
		0	9.1
			11.2
			10.5
	Plasma Aβ (Mouse; pg/mL))	165.449	188.355
		138.379	173.775
		169.432	169.567
		196.018	239.669
		186.059	179.849
			169.244
Figure 2E	Brain Aβ (1-40; pM/ug of protein)	6-months	12-months	18-months
		0.016226	0.011001	0.011581
		0.010752	0.017681	0.013728
		0.016617	0.007841	0.008428
		0.014068	0.008761	0.017334
		0.015273	0.003749	0.004992
			0.011001
	Brain Aβ (1-42; pM/ug of protein)	0	0.00160679	0
		0	0.00520978	7.26042e-05
		0.000380045	0.000144117	0.0016749
		0	0.00142544	0.00821011
		0	0	0
			0.00160679	0.00199152
		7.6009e-05	0.00166548

## Sheet: Figure 3A,B,Y
Figure 3. Lipid droplets are present in HSHA brain hippocampal formation at both 6 and 18-months of age
Figure 3A. Distribution of the average size of lipid droplets							Figure 3B. Mean area occupied by lipid droplets and number of lipid droplets per cell								Figure 3Y. % Abundance of lipid in the hippocampal formation
WT 6m	WT 12m	WT 18m	HSHA 6m	HSHA 12m	HSHA 18m		Mean Droplet Area	WT 6m	WT 12m	WT 18m	HSHA 6m	HSHA 12m	HSHA 18m		WT 4m	HSHA 4m	WT 18m	HSHA 18m
0.331064	0.467204	0.294512	0.33559	0.31449	0.581529		0.26687	2.34601							0	0	0	0.00754717
0.283825	0.32271	0.306989	0.322079	0.331997	0.507258		0.30663	3.41909							0	0.0791066	0.00431965	0.0485714
0.275399	0.305729	0.381906	0.301715	0.274796	0.449651		0.26801	1.49433							0	0.00643087	0.0242915	0.0306748
0.226463	0.423074	0.353948	0.305197	0.365201	0.408532		0.37612		3.36319						0	0	0	0.102199
0.263647	0.403766	0.328353	0.28964	0.39861	0.46244		0.41615		4.1648						0	0.00113507	0.0046083	0.0405941
0.337326	0.405453	0.31344	0.282614	0.335829	0.406083		0.4051		1.56404
0.242413	0.365504	0.274712	0.282276	0.28497	0.409041		0.29572			3.5723
0.348446	0.365729	0.261587	0.298023	0.289838	0.39412		0.39191			4.62373
0.257327	0.328364	0.287075	0.294534	0.371478	0.525134		0.39147			2.56898
0.256354	0.363102	0.312807	0.261881	0.329659	0.395923		0.3686			4.01643
0.228709	0.399997	0.280716	0.27594	0.372736	0.399991		0.33805			4.65495
0.262316	0.362762	0.255311	0.242872	0.404436	0.371081		0.35919			3.50188
0.262796	0.462215	0.269398	0.278404	0.259451	0.365352		0.29006				3.00742
0.290165	0.475109	0.243571	0.29467	0.25653	0.397025		0.30192				1.40518
0.245323	0.453968	0.323031	0.327763	0.297768	0.434748		0.348				0.84227
0.224426	0.439294	0.244105	0.387017	0.287509	0.425717		0.37009				1.54791
0.234554	0.401147	0.404315	0.327777	0.272333	0.339791		0.32664				3.14008
0.245039	0.386716	0.432317	0.284636	0.282735	0.447207		0.34976				1.65483
0.254876	0.450394	0.408567	0.280211	0.260908	0.485225		0.38368				1.6753
0.286844	0.438348	0.387516	0.331908	0.285325	0.465572		0.29137				2.2742
0.261573	0.356248	0.424292	0.301506	0.342981	0.428382		0.31383					2.84376
0.239058	0.461152	0.362321	0.277041	0.39753	0.512877		0.37569					2.36096
0.316444	0.318459	0.311024	0.240644	0.37718	0.451489		0.36299					1.94434
0.283523	0.350785	0.400283	0.267988	0.339953	0.454362		0.33943					1.49575
0.32607	0.288484	0.506727	0.410349	0.310053	0.538203		0.32433					3.27673
0.3375	0.422841	0.361722	0.335837	0.389219	0.398804		0.31943					4.2418
0.370322	0.416777	0.373771	0.399642	0.359589	0.470632		0.32218					2.21048
0.311696	0.481748	0.478214	0.352705	0.402893	0.451023		0.36691					4.49065
0.304293	0.451745	0.443629	0.45013	0.431307	0.504469		0.42785						4.57476
0.323936	0.492685	0.376854	0.315967	0.448415	0.503829		0.46398						2.46609
0.304034	0.384963	0.422763	0.431442	0.349415	0.438167		0.43526						2.34124
0.277765	0.376562	0.370336	0.412113	0.359742	0.442115		0.39722						2.91521
0.340103	0.330085	0.341727	0.374129	0.381266	0.358817		0.42058						5.98569
0.316281		0.402607	0.258689	0.398393	0.399111		0.41376						3.51103
0.232762		0.403267	0.330898	0.373752	0.525343		0.42823						2.32059
0.281438		0.311523	0.401619	0.364508	0.390187		0.42811						2.55019
0.277119		0.306357	0.265622	0.423399	0.355289
0.248613		0.303621	0.363349	0.348735	0.377103
0.34491		0.32831	0.258821	0.335641	0.339334
0.282454		0.417961	0.300942	0.450429	0.398759
0.275801		0.411418	0.288457	0.331059	0.447863
0.289411		0.450495	0.293633	0.287256	0.423947
0.239199		0.459861	0.39413	0.298503	0.384878
0.268858		0.546609	0.396235	0.330435	0.435941
0.24799		0.379547	0.27339	0.350099	0.360808
0.252092		0.375614	0.318593	0.317226	0.404933
0.303704		0.316262	0.338518	0.343135	0.398623
0.207831		0.291806	0.339444	0.336182	0.388469
		0.482467	0.337484	0.299573	0.421038
		0.359187	0.438914	0.337069	0.472747
		0.369175	0.420407	0.348605	0.424578
		0.398355	0.339601	0.392537	0.39421
		0.372909	0.334967	0.374422	0.377061
		0.352896	0.42038	0.32407	0.3862
		0.412277	0.379116	0.281024	0.500372
		0.422717	0.408706	0.294214	0.444135
		0.367383	0.366414	0.291885	0.400994
		0.428277	0.348474	0.393405	0.408686
		0.34071	0.347412	0.311259	0.435908
		0.348754	0.412885	0.28687	0.396865
		0.386179	0.309262	0.266687	0.345837
		0.336069	0.57324	0.336883	0.433055
		0.333102	0.536288	0.31764	0.374358
		0.391738	0.352606	0.347518	0.43136
		0.302995	0.313258	0.286746	0.482376
		0.36872	0.297008	0.298722	0.39779
		0.283379	0.344254	0.289301	0.397299
		0.307195	0.353692	0.351684	0.388207
		0.38836	0.339487	0.361186	0.418135
		0.379228	0.314763	0.373319	0.353402
		0.332106	0.338101	0.316569	0.394633
		0.414228	0.280605	0.400517	0.441102
		0.379169	0.263909	0.496084	0.473565
		0.317307	0.280171	0.391871	0.500404
		0.365675	0.325858	0.285797	0.423251
		0.325099	0.499236	0.298718	0.452144
		0.292609	0.338508	0.370568	0.344112
		0.368165	0.349882	0.306123	0.454423
		0.446416	0.597692	0.325416	0.363663
		0.346948	0.376156	0.307083	0.489282
		0.336294	0.360312	0.360574	0.500197
			0.295054	0.286679	0.490446
			0.360671	0.29294	0.458267
			0.333393	0.318256	0.506413
			0.330812	0.320266	0.432728
			0.310648	0.299663	0.464064
			0.378993	0.320334	0.422363
			0.273867	0.294186	0.380612
			0.249548	0.411503	0.370769
			0.281956	0.385231	0.316241
			0.313369	0.364658
			0.284461	0.367313
			0.264887	0.49519
			0.248156	0.423943
			0.268382	0.353699

## Sheet: Figure 4B-G
Figure 4. Neuronal degeneration and brain volumetric analyses in HSHA mice
Figure 4B to D. Quantitative analysis of neuronal degeneration in HSHA mice (FluoroJade C)
	6-month		12-month		18-month
	WT	HSHA	WT	HSHA	WT	HSHA
Hippocampal Formation	6.08	4	6.2	6.65	4.18	4.44
	2.23	5.07	5.44	9.89	2.08	2.24
	4.27	5.25	6.12	5.5	4.82	5.57
	2.35	6.17	4.31	12.33	3.29	6.38
		5		9.93		6.21
		5.88		10.14		7.8
		7.07		8.06		4.2
		8.55		6.22		4.46
				1.36
				2.94
				4.67
				5.13
Cortex	4.18	3.92	5.6	8	3.6	6.4
	2.38	10.38	3.5	9.11	1.33	3.8
	2	8	3.88	5.31	1.8	9.22
	2.43	3.5	5.1	9.71	4.33	5.13
		7.5	3.27	10.92		8.9
		5.44		13.44		6.27
		10		10.3		13.08
		8.92		8.14		8.89
				7.45
				13.11
Figure 4E to G. MRI Regional brain volumes
Brain Regions	8 months		12 months		18 months
	WT	HSHA	WT	HSHA	WT	HSHA
Cerebral Cortex	186.24	145.59	162.74	159.78	171.98	185.843
	164.22	170.78	154.92	136.93	173.926	169.123
	167.08	172.72	156.83	164.18
Hippocampal formation	39.82	33.7	34.48	22.83	20.903	21.508
	28.8	27.65	31.49	17.61	20.174	24.372
	27.99	19.43	28.91	30.29
Ventricles	17.76	17.98	21.08	20.19	20.752	15.627
	19.91	25.92	21.88	20.35	19.62	19.124
	22.93	27.78	17.49	29.93

## Sheet: Figure 5A-H
Figure 5. Three-dimensional confocal immunomicroscopy analysis of markers of cerebral capillary integrity, microglial activation and astrocytic immunoreactivity
Figure 5A-H
	IgG				Iba-1				C3				GFAP
	6-month		12-month		6-month		12-month		6-month		12-month		6-month		12-month
	WT	HSHA	WT	HSHA	WT	HSHA	WT	HSHA	WT	HSHA	WT	HSHA	WT	HSHA	WT	HSHA
Hippocampal Formation	19000000	8947443	1262345	2434474	283562600	677917200	524831200	425987500	21996930	84824020	31798170	23623710	94830860	106009000	124407000	77115550
	6945885	16000000	1969981	4707532	113203100	324238000	612613100	340040300	40279770	74803010	27320530	15015410	56642910	162210500	108362800	124111500
	10000000	15000000	3005174	4035078	118022700	371231800	1454892000	479994600	1069969	96268780	25013700	3366936	18021630	153730900	151186500	97199140
	21000000	33000000	2449808	3512213	160993800	475108100	543963900	506240300	29449790	21826740	45700010	19839840	37335920	116683000	158809700	140838000
		6741333		2930417		667531100		193756500		42907900		25525170		186607500		97624000
		13000000		1509598		385448200		241310700		17080220		10057460		37629000		79546110
		12000000		1201878		402474100		430238900		1593581		9372823		50943880		47790460
		40000000		476197		512471300		397937200		6848500		17133710		68650340		126976800
				32000000				236513600				12805330				92180680
				11000000				99383950				29082380				52931930
				3326436				55793420				17255190				47002910
				16000000				436821100				26405460				94381560
								340591700
								122985200
								112956900
								234351300
Cortex	11542650	9278185	13561930	21946760	324043600	838054400	587209300	439118700	13973580	168737500	21277010	7440438	13179880	34287720	25856380	17403300
	9656440	9952948	5637993	31107200	104965300	453460700	396953000	268888400	23286440	40402710	11712030	5502531	5446027	73698830	16157180	13977060
	6939463	26445390	4776169	5391150	153487600	394885300	594720900	309919900	130104	57959010	41035660	2095102	1298736	21872440	37309620	10155440
		20627040	6489961	53826230	136385200	626464400	1004682000	342162900	63130100	12114160	10401540	5290740	15127790	21161560	39668350	11253480
		21858170		14360620		782177000	610941200	171221300			77792980	8311719			33966760	16345190
		10509310		16717300		413928100		185883400		6133760		8943479		5217686		18633970
		27651110		37901920		339868000		383538800		1808166		2719425		8033027		12488920
		9587025		11127010		373902200		185118900		4298349		3926576		4871941		18087510
				19641750				62324700				5260038				7011430
				19547050				82302130				10815640				6234961
				3979799				126361000				10560240				13294290
				6493917				283769300				7952788				7149254
								75206450
								103450300
								151413200

## Sheet: Figure 7
Figure 7. Hippocampal learning behaviour in 12-month old HSHA mice
	Acquisition latency (s)	Retention latency (s)
WT	13.2	89.5
	39.4	179.8
	4.4	64.3
	21.8	163.9
HSHA	6	27.7
	26.5	31.2
	4.8	25
	5.8	39
	5.1	236.8
	4	23.1
	10.3	19.8
	10.4	25.8
	13.6	14.4
	6.4	29.6
	13	34.3
	2.9	67
	17.2	17.6
	21.9	30.4
	26.2	329.5

## Sheet: Table 1
Table 1. Standardised Uptake Value Ratio (SUVR) values of 11C PiB in WT and HSHA mice
Strain	Age (months)	PIB-PET SUVR:Whole Brain to Cerebellum Ratio
C57BL/6J (Pooled)	6 to 18	0.872
		0.936
		0.974
		0.842
		0.919
		1.012
		0.851
		0.956
		0.892
HSHA	6	0.941
		0.989
		0.983
	12	0.966
		1.037
		0.996
	18	1.137
		1.022
		1.091

## Sheet: Table 2
Table 2. Regional brain volume measurements (mm3) and their variation with age in WT and HSHA mice at 8, 12 and 18-months.
Brain Regions	8 months		12 months		18 months
	WT	HSHA	WT	HSHA	WT	HSHA
Cerebral Cortex	186.24	145.59	162.74	159.78	171.98	185.843
	164.22	170.78	154.92	136.93	173.926	169.123
	167.08	172.72	156.83	164.18
Hippocampal formation	39.82	33.7	34.48	22.83	20.903	21.508
	28.8	27.65	31.49	17.61	20.174	24.372
	27.99	19.43	28.91	30.29
Ventricles	17.76	17.98	21.08	20.19	20.752	15.627
	19.91	25.92	21.88	20.35	19.62	19.124
	22.93	27.78	17.49	29.93

## Sheet: S1
Supplementary Figure S1. Weights (g)
WT			HSHA
6-months	12-months	18-months	6-months	12-months	18-months
32	31.5	33	33.3	31.3	36.1
29.9	29	31	36	45.9	44.8
27.7	27	31.5	35.4	32.6	33.4
32.4	28	29	38.9	33.1	48.2
30.6	28		1.9	33.6	41.8
25			31.5	40.2	39.8
25			30.9	36.7	35.1
			30.6	31.2	39.7
			32.7	44.2	29
			32.5	42.6	31.5
			33.9	42.4	31
			32.1	32.6	37
			35.2	33.1
			33.8	29
			24.3	39.8
				39.3
				34.1
				32.7
				49

## Sheet: S2
Supplementary Figure S2. TUNEL Assay
Figure S2. TUNEL assay for cell apoptosis
6 months		12 months		18 months
WT	HSHA	WT	HSHA	WT	HSHA
0.23	0.13	0.03	0.06	0.02	0.02
0.3	0.07	0.16	0.7		0.44
0.11	0.02	0.04	0.22	0.22	0.1
	0.14	0.18	0.49		0.7
	0.1		0.49		1.11
					0.23

[truncated: 3 more sheets: S3, S4, S5]
